# Supplementary material for: Kpi, a chaperone-usher pili system associated with the worldwide-disseminated high-risk clone Klebsiella pneumoniae ST-15
Source: PubMed Central journal article supplement — Proc Natl Acad Sci U S A. 2020 Jul 8;117(29):17249–59. doi: 10.1073/pnas.1921393117 (PMC7382220; doi:10.1073/pnas.1921393117), 2020-07-08
Supplement: pnas.1921393117.sapp.pdf [file pnas.1921393117.sapp.pdf]

# PNAS

[www.pnas.org](http://www.pnas.org)

Supplementary Information for

Kpi, a chaperone-usher pili system associated with the worldwide-disseminated high-risk clone *Klebsiella pneumoniae* ST-15.

Eva Gato, Juan Carlos Vázquez-Ucha, Soraya Rumbo-Feal, Laura Álvarez-Fraga, Juan A. Vallejo, Marta Martínez-Gutián, Alejandro Beceiro, José Ramos-Vivas, Pedro J. Sola Campoy, María Pérez-Vázquez, Jesús Oteo Iglesias, Bruno Kotska Rodiño-Janeiro, Antonio Romero, Margarita Poza, Germán Bou, Astrid Pérez.

Astrid Pérez Gómez

Email: [astrid.perez.gomez@sergas.es](mailto:astrid.perez.gomez@sergas.es)

**This PDF file includes:**

Figures S1  
Tables S1 to S4  
SI References

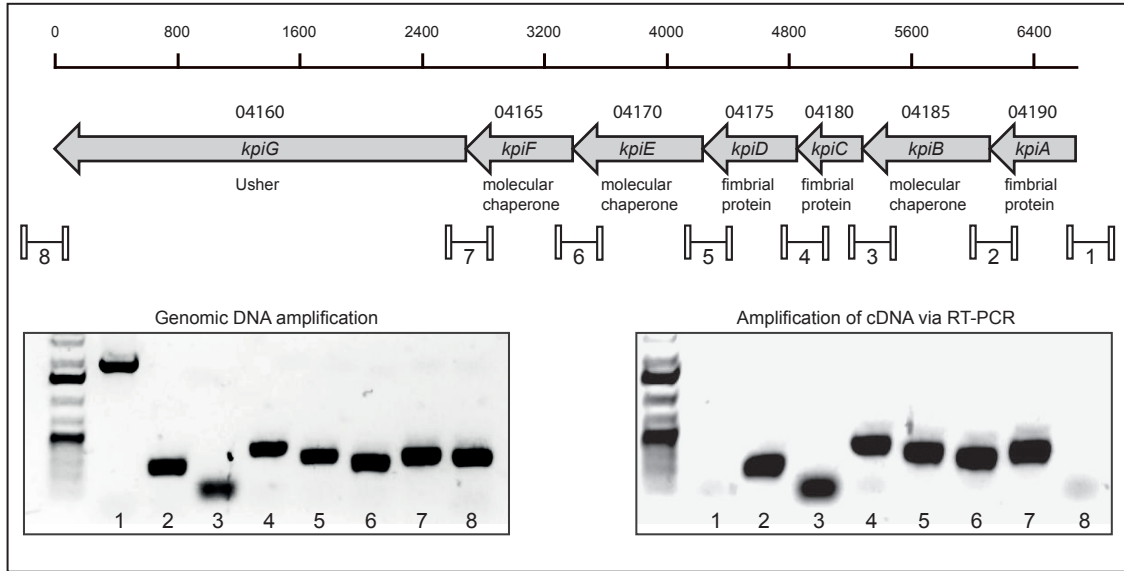

**Fig. S1.** Genetic organization of the *kpiABCDEFG* operon. Arrows indicate the location and direction of gene transcription. The numbers above the arrows represent the genes located within this operon. The connected open rectangles below the arrows indicate the regions amplified in PCR and RT-PCR assays using genomic DNA and DNA-free total RNA, respectively. Agarose gel electrophoresis revealed the results of genomic DNA amplification (left) and cDNA amplification by RT-PCR (right). The intergenic regions between genes within the operon are shown in lanes 2, 3, 4, 5, 6 and 7. Intergenic regions between the upstream gene and *kpiA* gene and between the downstream gene and *kpiG* are shown in lanes 1 and 8, respectively

**Table S1.** Protein structure modeling of the CUP system *kpiABCDEFGG* in *K. pneumoniae* using RaptorX.

| Operon Components              | Ranking | Score <sup>#</sup> | % Sequence Identity <sup>##</sup> | PDB code     | Description                                                | Model                                                                                 |
|--------------------------------|---------|--------------------|-----------------------------------|--------------|------------------------------------------------------------|---------------------------------------------------------------------------------------|
| KpiA (Fimbriae) <sup>###</sup> | ---     | ---                | ---                               | No structure | ---                                                        | ---                                                                                   |
| KpiB (Chaperone)               | 1       | 150/243            | 24                                | 5ghu         | Fimbrial chaperone YadV from <i>E. coli</i>                |    |
|                                | 2       | 160/243            | 24                                | 4djm         | Fimbrial chaperone DraB from <i>E. coli</i>                |                                                                                       |
|                                | 3       | 161/243            | 23                                | 2co6         | Type 1 chaperone from <i>Salmonella enterica</i>           |                                                                                       |
| KpiC (Fimbriae)                | 1       | 128/163            | 16                                | 5lp9         | Type 1 pilus subunit FimA from <i>Shigella flexneri</i>    |    |
|                                | 2       | 119/163            | 20                                | 6erj         | Type 1 pilus subunit FimA from <i>Salmonella paratyphi</i> |                                                                                       |
|                                | 3       | 104/163            | 14                                | 2jty         | Type 1 pilus main subunit from <i>E. coli</i>              |                                                                                       |
| KpiD (Fimbriae)                | 1       | 115/179            | 15                                | 5lp9         | Type 1 pilus subunit FimA from <i>Shigella flexneri</i>    |   |
|                                | 2       | 104/179            | 15                                | 6erj         | Type 1 pilus subunit FimA from <i>Salmonella paratyphi</i> |                                                                                       |
|                                | 3       | 110/179            | 14                                | 5afo         | Type 1 fimbriae adhesin LpfD from <i>E. coli</i>           |                                                                                       |
| KpiE (Chaperone)               | 1       | 157/264            | 26                                | 3rfz         | Chaperone protein FimC from <i>E. coli</i>                 |  |
|                                | 2       | 145/264            | 25                                | 4djm         | Fimbrial chaperone DraB from <i>E. coli</i>                |                                                                                       |
|                                | 3       | 150/264            | 24                                | 2co6         | Type 1 chaperone from <i>Salmonella enterica</i>           |                                                                                       |
| KpiF (Chaperone)               | 1       | 155/242            | 25                                | 5ghu         | Fimbrial chaperone YadV from <i>E. coli</i>                |  |
|                                | 2       | 144/242            | 27                                | 4djm         | Fimbrial chaperone DraB from <i>E. coli</i>                |                                                                                       |
|                                | 3       | 144/242            | 27                                | 2co6         | Type 1 chaperone from <i>Salmonella enterica</i>           |                                                                                       |
| KpiG (Usher)                   | 1       | 668/864            | 34                                | 3rfz         | Type 1, Outer membrane usher protein from <i>E. coli</i>   |  |

# Score (alignment length vs sequence length); ## number of identical residues multiplied by 100; ###KpiA was not structurally related to any crystalized protein.

**Table S2.** Set of usher proteins for the alignment and phylogenetic classification of KpiG.

| <b>Fimbrial clade</b> | <b>Usher</b> | <b>Usher Accession (NCBI Entrez)</b> | <b>Organism</b>                                       |
|-----------------------|--------------|--------------------------------------|-------------------------------------------------------|
| γ1                    | AtfC         | CAB01714.1                           | <i>Proteus mirabilis</i> HI4320                       |
| γ1                    | AufC         | AAN82650.1                           | <i>Escherichia coli</i> CFT073                        |
| γ1                    | BcfC         | AAL18987.1                           | <i>Salmonella enterica</i> Serotype Typhimurium LT2   |
| γ1                    | ECs0594      | BAB34017.1                           | <i>Escherichia coli</i> 0157:H7 str. Sakai            |
| γ1                    | FimD         | CAD56973.1                           | <i>Citrobacter freundii</i> 3009                      |
| γ1                    | FimD         | AAC77273.1                           | <i>Escherichia coli</i> K12                           |
| γ1                    | FimD         | AAL19500.1                           | <i>Salmonella enterica</i> Serotype Typhimurium LT2   |
| γ1                    | FmlC         | ABE07195.1                           | <i>Escherichia coli</i> UTI89                         |
| γ1                    | FocD         | AAN79699.1                           | <i>Escherichia coli</i> CFT073                        |
| γ1                    | SfaF         | CAC16953.2                           | <i>Escherichia coli</i> 536                           |
| γ1                    | SfmD         | AAC73634.1                           | <i>Escherichia coli</i> K12                           |
| γ1                    | YcbS         | AAC74026.1                           | <i>Escherichia coli</i> K12                           |
| γ1                    | YdeT         | AAC74578.1                           | <i>Escherichia coli</i> K12                           |
| γ1#                   | ECs4022      | BAB37445.1                           | <i>Escherichia coli</i> 0157:H7 str. Sakai            |
| γ1#                   | ECs4667      | BAB38090.1                           | <i>Escherichia coli</i> 0157:H7 str. Sakai            |
| γ1#                   | LpfC         | AAY18078.1                           | <i>Escherichia coli</i> 789                           |
| γ1#                   | LpfC         | AAL18163.1                           | <i>Escherichia coli</i> EH41                          |
| γ1#                   | LpfC         | AAL22498.1                           | <i>Salmonella enterica</i> Serotype Typhimurium LT2   |
| γ1#                   | PhfD         | CAE13290.1                           | <i>Photothabdus luminescens</i> subsp. laumondii TTO1 |
| γ1#                   | plu2157      | CAE14450.1                           | <i>Photothabdus luminescens</i> subsp. laumondii TTO1 |
| γ1#                   | StgC         | AAS99231.1                           | <i>Escherichia coli</i> X7122                         |
| γ1#                   | SthB         | AAL23408.1                           | <i>Salmonella enterica</i> Serotype Typhimurium LT2   |
| γ1#                   | StiC         | AAL19139.1                           | <i>Salmonella enterica</i> Serotype Typhimurium LT2   |
| γ1#                   | YraJ         | AAC76178.1                           | <i>Escherichia coli</i> K12                           |
| γ2                    | CswD (CS12)  | AAK09050.1                           | <i>Escherichia coli</i> 350C1                         |
| γ2                    | ECP_3814     | ABG71785.1                           | <i>Escherichia coli</i> 536                           |
| γ2                    | FasD (987P)  | AAB02687.1                           | <i>Escherichia coli</i> 987                           |
| γ2                    | FotD (CS18)  | AAO73849.1                           | <i>Escherichia coli</i> ARG-2                         |
| γ2                    | plu0268      | CAE12563.1                           | <i>Photothabdus luminescens</i> subsp. laumondii TTO1 |
| γ2                    | plu0784      | CAE13079.1                           | <i>Photothabdus luminescens</i> subsp. laumondii TTO1 |
| γ2                    | plu0791      | CAE13086.1                           | <i>Photothabdus luminescens</i> subsp. laumondii TTO1 |
| γ3                    | AfaC-3       | CAA54117.1                           | <i>Escherichia coli</i> A30                           |
| γ3                    | AfaC-7       | AAD44025.2                           | <i>Escherichia coli</i> 262 KH 89                     |
| γ3                    | AfaC-8       | AAD44022.2                           | <i>Escherichia coli</i> 239 KH 89                     |
| γ3                    | Agg3C        | AAM88296.1                           | <i>Escherichia coli</i> 55989                         |
| γ3                    | AggC         | AAA57452.1                           | <i>Escherichia coli</i> 17-2                          |
| γ3                    | Caf1A        | CAB55265.1                           | <i>Yersinia pestis</i> CO92                           |
| γ3                    | CS3-2        | P15484                               | <i>Escherichia coli</i> PB176                         |
| γ3                    | CssD (CS6)   | AAB51364.1                           | <i>Escherichia coli</i> E8775                         |
| γ3                    | DraC         | AAK16477.1                           | <i>Escherichia coli</i> IH11128                       |
| γ3                    | HdaC         | BAF33889.1                           | <i>Escherichia coli</i> O86:H-                        |

|    |             |            |                                                           |
|----|-------------|------------|-----------------------------------------------------------|
| γ3 | MyfC        | CAA79953.1 | <i>Yersinia enterocolitica</i>                            |
| γ3 | PsaC        | CAL19958.1 | <i>Yersinia pestis</i> CO92                               |
| γ3 | PSPPH_A0064 | AAZ38018.1 | <i>Pseudomonas syringae</i> pv. phaseolicola 1448A        |
| γ3 | SafC        | AAL19258.1 | <i>Salmonella enterica</i> Serotype Typhimurium LT2       |
| γ3 | SefC        | AAV80035.1 | <i>Salmonella enterica</i> Serotype Paratyphi A ATCC 9150 |

---

γ1#, γ1-Fimbriae related

**Table S3.** Bacterial strains and plasmids used in the present study.

| Strains and plasmids                | Relevant characteristics                                                          | Reference or Source |
|-------------------------------------|-----------------------------------------------------------------------------------|---------------------|
| <b><i>K. pneumoniae</i> strains</b> |                                                                                   |                     |
| MGH 78578                           | ATCC 700721 strain showing a highly adherent phenotype                            | ATCC                |
| ATCC 10031                          | Susceptible strain with no-adherent phenotype                                     | ATCC                |
| Kp09107                             | Clinical isolate with a no-adherent phenotype                                     | This study          |
| Kp727                               | Clinical isolate with a no-adherent phenotype                                     | This study          |
| Kp924                               | Clinical isolate with a no-adherent phenotype                                     | This study          |
| Kp1278                              | Clinical isolate with a no-adherent phenotype                                     | This study          |
| Kp3380                              | Clinical isolate with a highly adherent phenotype.                                | This study          |
| Kp3380 $\Delta$ <i>kpiD</i>         | <i>KpiD</i> -defective Kp3380 mutant strain                                       | This study          |
| Kp3380 $\Delta$ <i>kpiD_C</i>       | Kp3380 $\Delta$ <i>KpiD</i> strain harboring pUC_ <i>kpiD</i>                     | This study          |
| <b><i>E. coli</i></b>               |                                                                                   |                     |
| TG1                                 | Host strain used for cloning procedures                                           | Invitrogen          |
| <b>Plasmids</b>                     |                                                                                   |                     |
| pIJ773                              | Template vector for apramycin gene amplification                                  | (1)                 |
| pACBSR-hyg                          | Plasmid (hygromycin) containing an arabinose-inducible $\lambda$ -Red recombinase | (1)                 |

---

|                  |                                                                                            |            |
|------------------|--------------------------------------------------------------------------------------------|------------|
| pFLP-hyg         | Plasmid (hygromycin) containing a heat-shock inducible FLP recombinase and a p15A replicon | (1)        |
| pWH1266          | Cloning vector (tetracycline)                                                              | ATCC       |
| pUCP24           | Cloning vector (gentamicin)                                                                | (2)        |
| pUCP24/T         | Modified pUCP24 expression vector (tetracycline promoter)                                  | This study |
| pUC_ <i>kpiD</i> | pUCP24/T containing the <i>kpiD</i> gene                                                   | This study |

---



**Table S4.** Oligonucleotides used in the present work.

| Primer /Probe name            | sequence                                                                          | Use in the present study                                                       |
|-------------------------------|-----------------------------------------------------------------------------------|--------------------------------------------------------------------------------|
| KO_ <i>kpiD</i> _fow          | ctggttgaggctcctgtcagattcagtgatcgcc<br>cagtattacatttcgctgtgattccgggatccgctgacc     | Construction of Kp3380Δ <i>kpiD</i>                                            |
| KO_ <i>kpiD</i> _rev          | aaccacagtataaatctgcccgcagcttgcggaataca<br>ttcattttatcgccaattcatgtaggctggagctgcttc | Construction of Kp3380Δ <i>kpiD</i>                                            |
| ConfKO_ <i>kpiD</i> _fow      | ggaattgaaagtgtgacccc                                                              | Testing of <i>kpiD</i> gene deletion                                           |
| ConfKO_ <i>kpiD</i> _rev      | ctttatcgtcgctgtgtatc                                                              | Testing of <i>kpiD</i> gene deletion                                           |
| BamHI_pTET_Fw                 | cccggatcctactcttccttttcaatattatt                                                  | Cloning the tetracycline promoter into pUCP24 plasmid                          |
| SmaI_pTET_Rv                  | ggcccgggcccgaagaggcccgg                                                           | Cloning the tetracycline promoter into pUCP24 plasmid                          |
| <i>kpiD</i> _cloning_Fw       | atgcattacaatgaacggaccggtt                                                         | Cloning of <i>kpiD</i> gene into the pUCP24/T plasmid for complementation.     |
| SacI_ <i>kpiD</i> _cloning_Rv | cccgagctctcattcataaataaactgaagcgtc                                                | Cloning of the <i>kpiD</i> gene into the pUCP24/T plasmid for complementation. |
| pUCp24_check_Fw               | gcctgcctttcaggctgcaactggt                                                         | Testing of the plasmid construction pUCP24_ <i>kpiD</i> for complementation.   |

---

|                 |                                |                                                                 |
|-----------------|--------------------------------|-----------------------------------------------------------------|
| pUCp24_check_Rv | tggcacgacaggtttcccgactgga      | Testing of the plasmid pUCP24_ <i>kpiD</i> for complementation. |
| Kp_C5G826_Fow   | cagggcccggatccagt              | Reverse transcription.                                          |
| Kp_C5G825_Rev   | catgctgacaccagaaaggc           | Reverse transcription.                                          |
| Kp_C5G825_Fow   | ccactgacgctacgccgg             | Reverse transcription.                                          |
| Kp_C5G824_Rev   | ctctggcatcatcactgctc           | Reverse transcription.                                          |
| Kp_C5G824_Fow   | ttacattacgctcgccgatctaagggtggc | Reverse transcription.                                          |
| Kp_C5G823_Rev   | atgataccaacacgcaggcgagcgcca    | Reverse transcription.                                          |
| Kp_C5G823_Fow   | caaagatgtcgggtgtcggg           | Reverse transcription.                                          |
| Kp_C5G822_Rev   | tgctgacaacataaagccg            | Reverse transcription.                                          |
| Kp_C5G822_Fow   | taatatggataagctaattgtcgggtactg | Reverse transcription.                                          |
| Kp_C5G821_Rev   | aatataacgcgtgtctgactgagct      | Reverse transcription.                                          |
| Kp_C5G821_Fow   | ggtaagagcatggatgtgaaagggga     | Reverse transcription.                                          |
| Kp_C5G820_Rev   | attaccagtcgacccatgatggc        | Reverse transcription.                                          |
| Kp_C5G820_Fow   | aaaaaacgcgctttcaaaaatgatac     | Reverse transcription.                                          |

---

---

|                   |                           |                        |
|-------------------|---------------------------|------------------------|
| Kp_C5G819_Rev     | gaaatcccggatcaaaataatcacc | Reverse transcription. |
| Kp_C5G819_Fow     | gtcagtgccgtgtcagtttgacat  | Reverse transcription. |
| Kp_C5G818_Rev     | ctgcagtttctgagaaacgcttcc  | Reverse transcription. |
| Kp04160 Fow 53    | gcagttgccacgttactgaa      | qRT-PCR                |
| Kp04160 Rev 53    | atcaccacacgatgctgcta      | qRT-PCR                |
| Kp820 Fow 141     | gctcagtcagacacgcgta       | qRT-PCR                |
| Kp820 Rev 141     | acctggccgctgttattct       | qRT-PCR                |
| Kp04175 Fow 92    | attttcagccacgctggt        | qRT-PCR                |
| Kp04175 Rev 92    | gtaatactgggccgatccac      | qRT-PCR                |
| Kp822-823 Fow 152 | ctaccgtggcgatgttacct      | qRT-PCR                |
| Kp822-823 Rev 152 | gacatcttggcggtgtcg        | qRT-PCR                |
| Kp824 Fow 122     | gtcggcgtaacaagttcagtc     | qRT-PCR                |
| Kp824 Rev 122     | ccttcgatatcccgtgagac      | qRT-PCR                |
| Kp825 Fow 102     | ccgttggctttatgattaagga    | qRT-PCR                |
| Kp825 Rev 102     | tcacatccaaagccacattc      | qRT-PCR                |
| PreChapFimC Fow 2 | tgagcctgaaaaccatacctg     | qRT-PCR                |
| PreChapFimC Rev 2 | ttgcatagccagcgtcaa        | qRT-PCR                |

---

## References

1. Huang TW, et al. (2014) Capsule deletion via a  $\lambda$ -Red knockout system perturbs biofilm formation and fimbriae expression in *Klebsiella pneumoniae* MGH 78578. *BMC Res Notes* 7:13.
2. Pérez A, et al. (2012) Effect of Transcriptional Activators SoxS, RobA, and RamA on Expression of Multidrug Efflux Pump AcrAB-TolC in *Enterobacter cloacae*. *Antimicrob Agents Chemother* 56(12):6256–6266.
